# Supplementary material for: Comparison of Whole Genome Sequencing with Clinical Targeted Panel Sequencing of Metastatic Prostate Cancer: Insights from Real- World Data
Source: Research Square preprint supplement (doi:10.21203/rs.3.rs-6993200/v1), 2025-07-03
Supplement: Supplementary file 1 [file 805fe67465de1d9b22dedc43.docx]

| **Gene** | **Variant** |
| --- | --- |
| ABL1 | K609del |
| APC | T1556Nfs*3 |
| AR | L702H |
| AR | L702H |
| AR | L702H |
| BRAF | N236K |
| CTNNB1 | G34R |
| HRAS | Q61R |
| MED12 | S1299F |
| MED12 | D1309H |
| MYD88 | T157A |
| NFE2L2 | A461V |
| PDGFRA | S56T |
| SPOP | Y87N |

**Supplementary Table 1. Clinically actionable variants missed by TPS but detected by TE-WGS.** List of 14 deleterious mutations in clinically relevant genes detected by target-enhanced whole genome sequencing (TE-WGS) but missed by tumor profiling sequencing (TPS) due to limited hotspot coverage.
